# Supplementary material for: Iris sanguinea is conspecific with I. sibirica (Iridaceae) according to morphology and plastid DNA sequence data
Source: PeerJ. 2020 Oct 1;8:e10088. doi: 10.7717/peerj.10088 (PMC7533061; doi:10.7717/peerj.10088)
Supplement: Supplemental Information 4 [file peerj-08-10088-s004.xlsx]

## Sheet: Лист1
Iris sanguinea											Iris sibirica											Iris typhifolia
LL	LW	SH	IS	NF	NC	CL	BL	PL	FL		LL	LW	SH	IS	NF	NC	CL	BL	PL	FL		LL	LW	SH	IS	NF	NC	CL	BL	PL	FL
47	0.7	52	1	2	1	6.2	3.2	2.8	1.7		29	0.5	31	1	1	1	5	3	1.5	2.5		32	0.3	39	1	2	2	4.5	3	1	5.3
54	0.2	62	1	2	1	8	4.8	1.1	2		59	0.8	65	1	2	2	3.7	2.8	3	2		35	0.3	44	1	2	2	7.3	4	1	5.5
41.5	0.2	48.5	1	2	2	6	3.5	1.4	2		36	0.5	71	2	4	2	5	2.6	2.4	2.4		35	0.3	50.5	1	2	2	7	5.2	3.2	2.3
56.5	0.6	63	1	2	1	6.5	4.1	1.5	2		70	0.5	66	1	2	2	7.8	3	5.8	2.5		38	0.2	52	1	2	3	5	5.5	2.5	4.5
26	0.2	26	1	1	1	4	3	2.1	2		28	0.4	22	1	1	0	0	4.2	4.8	2.6		28	0.2	45.5	1	1	2	6	4.4	2.7	3.2
38	0.4	44	1	2	2	6.1	4.6	1.6	2.2		54	0.7	69	1	2	1	11.5	4.0	1	2.3		34	0.2	40	1	2	2	6.5	4.7	2.4	4.7
55	0.5	48.5	1	3	1	7.3	2.7	0.8	2.5		54	0.5	70	1	1	2	7.3	3	0.8	3		32	0.3	61	1	2	2	7	6	2.5	5
55	0.3	52.5	1	2	2	4.7	3.4	1	2.5		68	0.6	94	1	3	2	8.5	3.6	1	3.8		44	0.2	55	1	2	2	6	4.6	2.5	4
70	0.4	60	1	2	2	9	5.2	1.7	2.6		31	0.2	43	1	2	2	5	3.3	2.3	3.2		38	0.2	60	1	1	3	7.5	5.1	2.5	4.5
48	0.3	47	1	3	1	8.5	4	1	2.7		47	0.5	72	1	2	2	4.7	3	1	3.2		35	0.3	43.5	1	1	2	9	5.5	6	3.5
55	0.3	77.5	2	4	3	5	3	1.9	2.8		72	0.4	83	1	3	2	5.5	3.2	0.7	2.8		95	0.2	51	1	2	2	5.5	5	2.2	4.5
40	0.3	68	1	3	0	0	4.5	3.5	2.8		58	0.6	79	1	2	2	4.8	3.5	0.8	4.2		40	0.2	43.5	1	2	2	4.8	4.2	1.6
77	0.6	48	1	2	2	5	2.5	1.8	2.8		64	0.7	63	1	3	1	7	3.5	0.7	3.1		37	0.2	64	1	2	2	7	4.2	2.5
53	0.5	65	2	3	2	4.2	2.8	2.8	3		60	0.7	74	1	3	2	9	3.7	0.7	3.2		65	0.4	52	1	2	3	6.5	3.5	2.5
42	0.2	41.5	2	3	1	25	3.2	4.1	3		69	0.6	55	1	2	1	5	3.6	1.6	2.8		52	0.4	39	1	1	1	7	5.4	2
39	0.4	35	1	2	1	7	3	1.3	3		70	0.8	51	2	4	1	6.5	3.7	0.5	3		47	0.4	47.5	1	1	2	9	4.5	2.5
43	0.4	36.5	1	2	1	4	3.6	2	3		31	0.3	55	1	2	1	7.2	3	2	3.4		52	0.3	37.5	1	1	2	7.5	3	1.5
47.5	0.5	47.5	1	2	1	7.5	2.7	4.7	3.3		24	0.3	81	2	4	1	7	3.6	1.5	3.5		38	0.4	56	1	1	2	9.5	4.5	2.2
41	0.5	40	1	2	2	6	3.8	1.3	3.3		64	0.5	93	2	4	2	7.3	2.8	1	2.7		30	0.4	42.5	1	2	2	7	4.7	1.8
44	0.3	55	1	3	1	4	3	2.5	3.3		88	0.6	99	1	2	2	7.4	3.8	1.4	3.6		30	0.2	57.5	1	1	2	4.8	3.2	2.2
47.5	0.3	55	2	4	2	3.5	3.1	2.1	3.3		74	0.6	65	2	3	2	6.5	3	0.6	2.8		33	0.4	66	1	2	2	8	5.2	4
46	0.3	43	1	3	1	8	3	0.8	3.3		54	0.2	49	1	2	2	4.5	2.5	0.8	3.2		28	0.3	44	1	2	1	4.6	3.5	2
29	0.2	35	1	2	1	5.9	3.3	1.8	3.4		56	0.6	55	1	3	2	5	2.8	0.5	3.6		35	0.2	50.5	2	3	2	4.7	4.2	0.6
38.5	0.3	28	1	3	2	4.3	2.8	1.2	3.5		52	0.4	41	1	2	1	6.5	3.5	0.7	2		52.5	0.3	46	1	1	2	4.5	4.5	2
34	0.3	43.5	1	2	2	4.8	2.3	0.8	3.5		79	0.5	82	2	4	3	6.5	4.3	1	3.5		45	0.2	54	2	3	1	7.5	4.5	2.2
30	0.4	23	1	2	1	5.8	3	0.6	3.5		36	0.2	40.5	1	2	2	4.5	3	1.4	3.4		38	0.3	60	1	2	2	6.5	5.5	1.5
36	0.4	68	1	3	2	5.8	2.7	1.3	3.5		33	0.5	58.5	2	4	2	5.5	2.7	0.4	3.6		37	0.2	59.5	1	2	2	6.5	5	1.5
25	0.3	25	1	2	0	0	3.5	2.2	3.5		50	0.6	44.5	1	2	0	0	5.2	5	3.2		56	0.3	74	1	2	2	8.3	5	3.3
30	0.4	33	1	2	1	6.5	3.6	2.4	3.5		77	0.8	90.5	2	3	2	5.4	3.2	3.2	2.6		48.5	0.3	64	2	3	3	6	6	3.3
30	0.3	45	1	2	1	7.5	2	1.4	3.5		42.5	0.4	52	1	2	1	6.9	5.5	1.8	1.9		43	0.2	35	1	2	2	5.8	5.5	5.8
33.5	0.3	43	1	2	1	6	2.7	1	3.8		56	0.5	37.5	1	2	1	13.5	5.5	6	2.8		50	0.4	63	1	2	2	7	4	2.5
30	0.4	41	1	2	1	4.6	2.2	1.3	4		44	0.7	32	1	1	1	5.8	3	1	2		44	0.4	48.5	1	2	2	7	4.8	2.5
38	0.4	36	1	2	1	5	2.7	3.5	4		53	0.7	63.5	1	3	1	9	3	3.3	3.6		58	0.4	57.5	1	1	2	7.5	4.2	3.2
24	0.3	36	1	3	1	6	4	3.2	4		81	1.1	62	1	2	1	7	3	2.7	1.8		33	0.4	66.5	1	1	3	6.4	4.6	1
32	0.3	43.5	1	2	1	4.8	3.2	1.5	4		73	0.6	87	1	3	2	9.8	2.5	1.6	3.7		37	0.2	62.5	1	1	3	4	5.7	0.5
51	0.5	64	1	2	1	7.5	3.5	3.5	4		42	0.6	57	2	3	1	6.2	2.5	0.4	3.5		34	0.2	50	1	2	2	5.5	4.1	1.5
37	0.5	36	1	2	0	0	4	4	4		40	0.6	64	2	4	1	7.7	3.5	0.9	2.8		42	0.4	50	1	1	3	5.5	3.5	2
38	0.4	47	1	2	1	8.4	4	4	4.1		48	0.6	37.5	1	2	1	10.3	3.4	0.5	1.5		35	0.3	67	1	2	3	8.3	5.1	1.8
34	0.4	59.5	1	2	1	4	2.2	1.8	4.1		29	0.3	51	1	2	1	6	3	1.4	2		99	0.4	50	2	2	2	8	4.5	5.5
44	0.4	64	1	4	2	5	2.3	1	4.3		45	0.6	56.5	2	3	2	4.9	3.1	1			41	0.4	72	1	2	3	7	4.5	3.5
31	0.3	35	1	2	1	5.5	3	1	4.4		60	0.6	68.5	1	2	3	4	3.1	4.2			43	0.2	53	1	2	2	9	5	3
68	0.6	63.5	1	2	2	3.8	2	2.3	4.5		86	0.8	77.5	2	4	2	6.3	3.3	0.9			32	0.2	50	2	3	3	4.8	4	2
63	0.6	71	1	3	2	5.4	2.7	1.4	4.5		68.5	0.5	87.5	2	6	2	6.6	3.5	1.4			57	0.3	69	1	2	2	8.9		2.8
27.5	0.3	29	1	2	2	5	2.8	2	4.5		41	0.4	50	1	3	1	7.8	3	1.2				0.2	63	1	2	3			0.5
48	0.4	40	1	2	1	9	3.9	2.3	4.5		40.5	0.4	55.6	1	2	1	4.9	2.7	0.6					44.5	1	2	3			2
33	0.5	35	1	1	2	5.1	2.8	3.7	4.6		44.5	0.4	45.2	1	1	2	4.2	3.3	5.3					43	1	2	2			1.5
32.5	0.5	39.5	1	3	1	8	3.7	2.5	4.6		61	0.8	70	2	4	2	4.6	2.5	0.9						2	4	2
42	0.2	57	1	2	2	7.7	5.1	2	5		39	0.4	42	1	2	2	3.8	2.2	0.9						1	2
52	0.4	64	1	2	2	8.8	6.2	1.8	5		40	0.5	50	2	4	2	3.7	2.6	0.8
39	0.2	46	2	3	2	8	4.6	2	5		54.5	0.4	53.5	2	4	3	4.4	3	0.6
40	0.2	48	1	2	1	6.5	4	2.3	5.2		71	0.6	53.5	1	3	2	9.5	4.2	1.1
41.5	0.2	70.5	1	2	1	12.5	7	3.3	5.4		77.5	0.6	50.5	1	2	2	9.5	3.4	1
35	0.2	46.5	1	2	1	16	5.7	2	6		62	0.5	66.5	2	3	2	5.2	3.4	3.4
53	0.6	57.5	1	1	1	9.5	2.4	2.1	7.7		77	0.6	55	2	5	2	6.3	3.5	4.2
41	0.4	55	1	1	1	4.5	2.5	3.5			59.5	0.6	42	1	2	1	4.8	2.1	0.4
40	0.4	47	1	2	1	5.3	3	1.8			52	0.4	48	1	3	1	6.3	2.4	0.5
57	0.6	45	1	2	1	17	5.4	2.8			80	0.8	65	2	6	2	5.5	3.2	0.8
61	1.1	51	2	3	2	7.5	4.4	3.5			71	0.6	83	1	2	2	6	2.8	0.8
47	0.3	41.5	1	2	2	8.8	5.5	3.5			62	0.5	78	2	4	3	5.3	3.2	0.8
41	0.6	49	1	2	1	8.5	3.5	1.2			44	0.4	58	1	2	2	4.8	2.6	3.4
69	0.6	58	1	2	2	13.5	4	1.8			81	0.5	74	1	2	2	5	2.2	2
70	0.7	82	1	2	2	22.5	4.3	3			69	0.5	67.5	1	2	2	4.7	3	0.7
39	0.5	45.5	1	2	2	5.7	4.6	6.5			47	0.4	60	1	3	1	7	2.1	0.7
64	0.5	47	1	2	1	13	5	2.5			53	0.4	69.5	1	3	1	12	4.1	2
38	0.7	45.5	1	2	1	8	3.4	1.2			31	0.3	48	2	3	3	3.5	2.2	0.5
38	0.5	43	1	2	2	6	4.7	1.5
45	0.3	67	1	2	1	5.8	2.7	3
52	0.7	57	1	2	1	13	5.5	1
